# Supplementary material for: Unlocking the potential of self-healing and recyclable ionic elastomers for soft robotics applications
Source: Royal Society of Chemistry journal article supplement (doi:10.1039/d3mh01312j), 2023-11-17
Supplement: d3mh01312j1.pdf [file d3mh01312j1.pdf]

## SUPPLEMENTARY INFORMATION

### Unlocking the Potential of Self-Healing and Recyclable Ionic Elastomers for Soft Robotics Applications

S. Utrera-Barrios<sup>1,\*</sup>, N. Steenackers<sup>2,3</sup>, S. Terryn<sup>2,3</sup>, P. Ferrentino<sup>3</sup>, R. Verdejo<sup>1</sup>,  
G. Van Asche<sup>2</sup>, M. A. López-Manchado<sup>1</sup>, J. Brancart<sup>2</sup>, M. Hernández Santana<sup>1,\*</sup>

<sup>1</sup> Institute of Polymer Science and Technology (ICTP), CSIC, Juan de la Cierva 3, 28006 Madrid, Spain

<sup>2</sup> Physical Chemistry and Polymer Science (FYSC), Department of Materials and Chemistry (MACH), Vrije Universiteit Brussel (VUB), Pleinlaan 2, B-1050 Brussels, Belgium

<sup>3</sup> Brubotics, Vrije Universiteit Brussel (VUB) and Imec, Pleinlaan 2, B-1050 Brussels, Belgium

\* corresponding authors: sutrera@ictp.csic.es; marherna@ictp.csic.es

#### Supplementary Information S1. Product data for Krynac X 750 supplied by Arlanxeo.

| Property Name               | Nominal Value          | Test Method                            |
|-----------------------------|------------------------|----------------------------------------|
| Mooney viscosity            | 47 MU                  | ISO 289 / ASTM D 1646 / ML(1+4) 100 °C |
| Acrylonitrile (ACN) content | 27.0 wt. %             | ISO 24698                              |
| Carboxyl (COOH) groups      | 7.0 wt. %              | -                                      |
| Density                     | 0.99 g/cm <sup>3</sup> | Internal method                        |

#### Supplementary Information S2. IR spectra of the ionic elastomers.

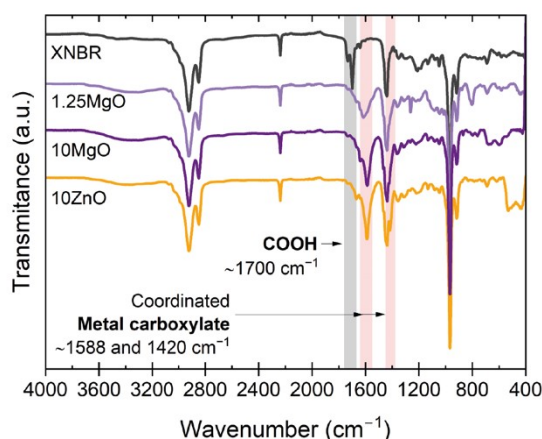

### Supplementary Information S3. DSC and TGA results.

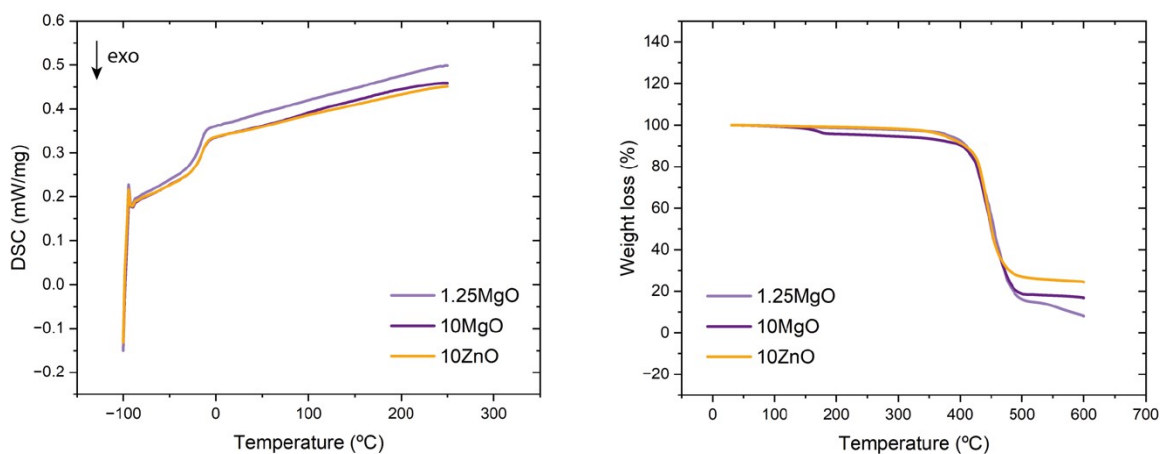

*Differential scanning calorimetry (DSC):* A differential scanning calorimeter (DSC 214 Polyma, Netzsch) was used to determine the thermal properties of the compounds in a nitrogen atmosphere. A heating sweep (from  $-100\text{ }^{\circ}\text{C}$  to  $250\text{ }^{\circ}\text{C}$ ) was performed at  $10\text{ }^{\circ}\text{C min}^{-1}$ .

*Thermogravimetric analysis (TGA):* A thermal analyzer (TGA 2, Mettler Toledo) was used. A heating sweep from room temperature to  $600\text{ }^{\circ}\text{C}$  (in a nitrogen atmosphere) was performed, using a heating rate of  $10\text{ }^{\circ}\text{C min}^{-1}$ . The recorded spectra were analyzed using TA Universal Analysis software.

### Supplementary Information S4. Healing efficiency based on M300 values of the ionic elastomers.

| Time (h) | 1.25MgO     | 10MgO       | 10ZnO        |
|----------|-------------|-------------|--------------|
| 3        | $106 \pm 5$ | $106 \pm 7$ | $165 \pm 54$ |
| 5        | $103 \pm 1$ | -           | $120 \pm 15$ |
| 7        | $78 \pm 5$  | -           | $140 \pm 7$  |

**Supplementary Information S5.** Stress-strain curves of the ionic elastomers in pristine and healed state (healing protocol: 110 °C, 3 h, rectangular specimens).

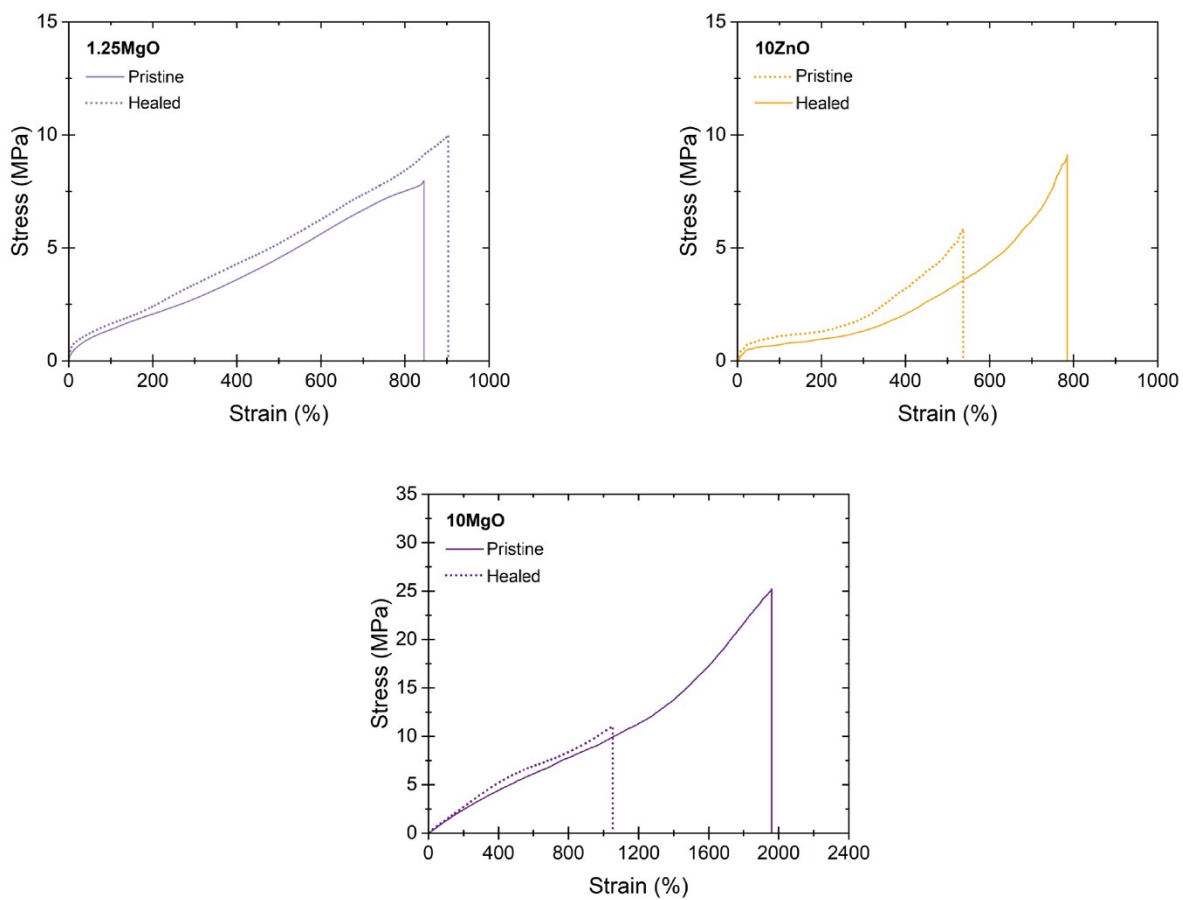

**Supplementary Information S6.** Storage ( $E'$ ) and Loss moduli ( $E''$ ) by DMA.

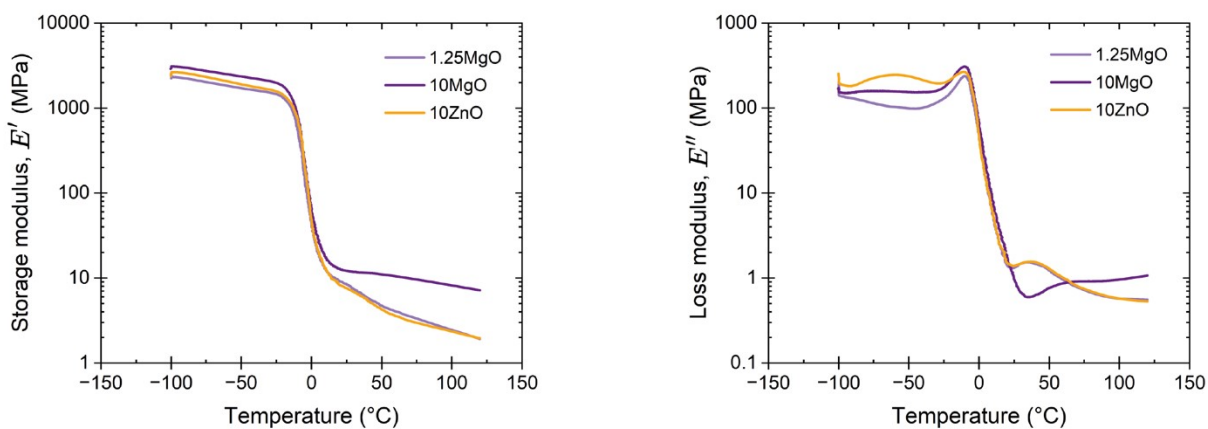

**Supplementary Information S7.** Evolution of the mechanical properties (M300, TS, and EB) and crosslink density of 10ZnO through three recycling cycles.

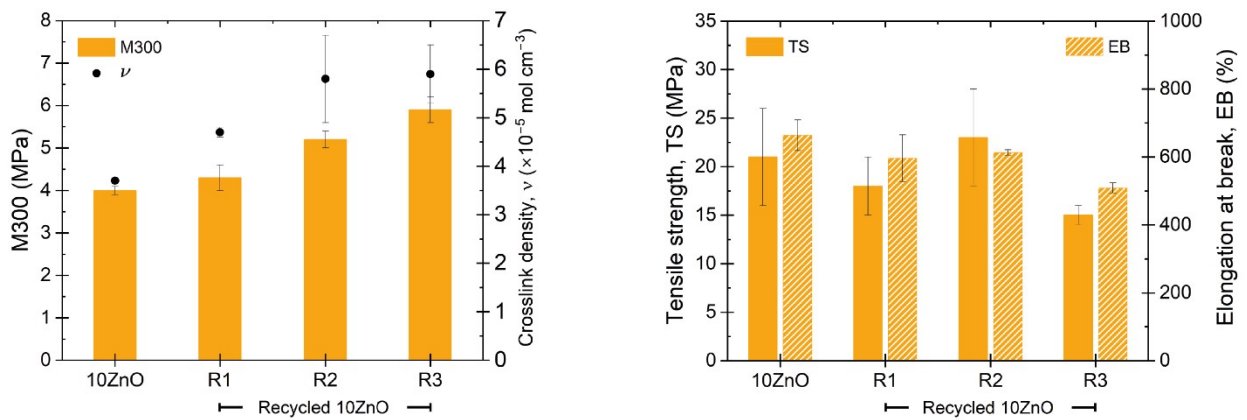

Adapted from *Materials & Design*, 2023, 233, 112273, DOI: 10.1016/j.matdes.2023.112273 with permission from Elsevier.

**Supplementary Information S8.** Video of the actuation.

[https://drive.google.com/file/d/1kmG13XX5t1Q-3gGtjqhq1kDD0\\_2-dhPz/view?usp=sharing](https://drive.google.com/file/d/1kmG13XX5t1Q-3gGtjqhq1kDD0_2-dhPz/view?usp=sharing)
